# Supplementary material
Source: HighWire-hosted journal article supplement (http://jpet.aspetjournals.org/highwire/filestream/141196/field_highwire_adjunct_files/0/244129SupplData.pdf)
Supplement: 244129SupplData.pdf [file 244129SupplData.pdf]

*The Journal of Pharmacology and Experimental Therapeutics*

**The triple angiokinase inhibitor nintedanib directly inhibits tumor cell growth and induces tumor shrinkage via blocking oncogenic receptor tyrosine kinases**

Frank Hilberg, Ulrike Tontsch-Grunt, Anke Baum, Anh T. Le, Robert C. Doebele, Simone Lieb, Davide Gianni, Tilman Voss, Pilar Garin-Chesa, Christian Haslinger and Norbert Kraut

Boehringer Ingelheim RCV GmbH Co KG, Dr. Boehringer-Gasse 5-11, A-1121 Vienna, Austria (F.H., U.T-G, A.B., S.L., D.G., P.G-C, C.H., N.K.)

University of Colorado, School of Medicine, Division of Medical Oncology, 12801 E. 17th Ave., MS 8117, Aurora, CO 80045 (A.T.L., R.C.D.)

AstraZeneca - Innovative Medicines and Early Development | Discovery Sciences, 310 Unit Darwin Building - Cambridge Science Park - Milton Rd - CB4 0WG (D.G.)

## Hilberg et al., Supplementary Tables:

| <b>Table S1a</b>                                                    |                      |                        |                         |                                             |                        |
|---------------------------------------------------------------------|----------------------|------------------------|-------------------------|---------------------------------------------|------------------------|
| <b>Sensitive cell lines: sensitivity, tumor type, altered genes</b> |                      |                        |                         |                                             |                        |
| <b>Cell Line</b>                                                    | <b>GI50 (nmol/l)</b> | <b>tumortype</b>       | <b>histology_type</b>   | <b>histology_subtype</b>                    | <b>altered gene</b>    |
| A-204                                                               | 21,79                | rhabdomyosarcoma       | rhabdomyosarcoma        |                                             | FLT4, NTRK1            |
| A-427                                                               | 311,8                | NSCLC                  | adenocarcinoma          |                                             | 418 mutated genes      |
| BV-173                                                              | 405,3                | hematopoietic/leukemia | myeloid leukemia        | CML, chronic myelogenous leukemia           | FLT4, KIT, PDGFRB      |
| CGTH-W-1                                                            | 8,883                | thyroid carcinoma      | carcinoma               | follicular                                  | KDR, KIT               |
| CML-T1                                                              | 155,2                | hematopoietic/leukemia | myeloid leukemia        | CML, chronic myelogenous leukemia           | BTK, FLT1, FYN, NTRK1  |
| EM-2                                                                | 174,8                | hematopoietic/leukemia | myeloid leukemia        | CML, chronic myelogenous leukemia           | MAP3K3                 |
| G-402                                                               | 7,712                | renal cancer other     | leiomyoblastoma         |                                             | 311 mutated genes      |
| KATO III                                                            | 209,2                | gastric carcinoma      | carcinoma               | gastric                                     | DDR2, FGFR2, FLT1      |
| MEG-01                                                              | 420,5                | hematopoietic/leukemia | myeloid leukemia        | CML, chronic myelogenous leukemia           | FGFR1, KDR, KIT, NTRK1 |
| MV-4-11                                                             | 52,88                | hematopoietic/leukemia | lymphoid leukemia       | AML, biphenotypic B myelomonocytic leukemia | FLT3-ITD, CSF1R, NUA1  |
| SJCRH30                                                             | 219,6                | rhabdomyosarcoma       | rhabdomyosarcoma        |                                             | PDGFRA, PDGFRB         |
| SW579                                                               | 21,98                | thyroid carcinoma      | squamous cell carcinoma |                                             | KIT                    |

| <b>Table S1b</b>                                             |                  |                    |              |
|--------------------------------------------------------------|------------------|--------------------|--------------|
| <b>Sensitive cell lines and their respective indications</b> |                  |                    |              |
| <b>tumortype</b>                                             | <b>sensitive</b> | <b>insensitive</b> | <b>total</b> |
| gastric carcinoma                                            | 1                | 5                  | 6            |
| NSCLC                                                        | 1                | 14                 | 15           |
| renal cancer other                                           | 1                | 2                  | 3            |
| rhabdomyosarcoma                                             | 2                | 2                  | 4            |
| thyroid carcinoma                                            | 2                | 2                  | 4            |
| hematopoietic/leukemia                                       | 5                | 12                 | 17           |
|                                                              | 12               |                    |              |

| <b>Table S2</b>                                                                                               |            |              |             |              |              |             |             |             |            |            |            |               |              |              |              |               |               |
|---------------------------------------------------------------------------------------------------------------|------------|--------------|-------------|--------------|--------------|-------------|-------------|-------------|------------|------------|------------|---------------|--------------|--------------|--------------|---------------|---------------|
| <b>Distribution of alterations in sensitive cell lines (m: mutation; a: amplification; e: overexpression)</b> |            |              |             |              |              |             |             |             |            |            |            |               |              |              |              |               |               |
| <b>cell line</b>                                                                                              | <b>BTK</b> | <b>CSF1R</b> | <b>DDR2</b> | <b>FGFR1</b> | <b>FGFR2</b> | <b>FLT1</b> | <b>FLT3</b> | <b>FLT4</b> | <b>FYN</b> | <b>KDR</b> | <b>KIT</b> | <b>MAP3K3</b> | <b>NTRK1</b> | <b>NTRK3</b> | <b>NUAK1</b> | <b>PDGFRA</b> | <b>PDGFRB</b> |
| A-204                                                                                                         |            |              |             |              |              |             |             | m           |            |            |            |               |              | m            |              |               |               |
| BV-173                                                                                                        |            |              |             |              |              |             |             | e           |            |            | m          |               |              |              |              |               | e             |
| CGTH-W-1                                                                                                      |            |              |             |              |              |             |             |             |            | a          | a          |               |              |              |              |               |               |
| CML-T1                                                                                                        | m          |              |             |              |              | m           |             |             | m          |            |            |               | m            |              |              |               |               |
| EM-2                                                                                                          |            |              |             |              |              |             |             |             |            |            |            | e             |              |              |              |               |               |
| KATO III                                                                                                      |            |              | m           |              | a            | m           |             |             |            |            |            |               |              |              |              |               |               |
| MEG-01                                                                                                        |            |              |             | m            |              |             |             |             |            | e          | e          |               | e            |              |              |               |               |
| MV-4-11                                                                                                       |            | e            |             |              |              |             | m           |             |            |            |            |               |              |              | e            |               |               |
| SJCRH30                                                                                                       |            |              |             |              |              |             |             |             |            |            |            |               |              |              |              | m             | m             |
| SW579                                                                                                         |            |              |             |              |              |             |             |             |            |            | a          |               |              |              |              |               |               |

| <b>Table S3</b> |                          |           |
|-----------------|--------------------------|-----------|
| cellline name   | TumorType                | EC50 [nM] |
| 22Rv1           | prostate carcinoma       | 2727      |
| 5637            | bladder carcinoma        | 5594      |
| 639-V           | bladder carcinoma        | 1886      |
| 647-V           | bladder carcinoma        | 3775      |
| 769-P           | renal carcinoma          | 5475      |
| 786-O           | renal carcinoma          | 3848      |
| A101D           | melanoma                 | 8008      |
| A-172           | astrocytoma/glioblastoma | 2742      |
| A-204           | rhabdomyosarcoma         | 10,02     |
| A-375           | melanoma                 | 3429      |
| A-427           | NSCLC                    | 409,1     |
| A-431           | skin/SCC                 | 454       |
| A-498           | renal carcinoma          | 6413      |
| A549            | NSCLC                    | 4230      |
| A-673           | sarcoma/soft tissue      | 4123      |
| A7              | melanoma                 | 4291      |
| ACHN            | renal carcinoma          | 5856      |
| AGS             | gastric carcinoma        | 2731      |
| AN3 CA          | uterus carcinoma         | 1529      |
| ARH-77          | hematopoietic/leukemia   | 4489      |
| AsPC-1          | pancreas carcinoma       | 4449      |
| AU565           | breast carcinoma         | 3872      |
| BC-1            | hematopoietic/lymphoma   | 3064      |
| BE(2)-C         | neuroblastoma            | 622,2     |
| BeWo            | placenta carcinoma       | 4249      |
| BFTC-905        | bladder carcinoma        | 3370      |
| BHT-101         | thyroid carcinoma        | 3895      |
| BM-1604         | prostate carcinoma       | 10000     |

|           |                             |       |
|-----------|-----------------------------|-------|
| BPH-1     | prostate benign hyperplasia | 1497  |
| BT-20     | breast carcinoma            | 6384  |
| BT-474    | breast carcinoma            | 3173  |
| BT-483    | breast carcinoma            | 3590  |
| BT-549    | breast carcinoma            | 3544  |
| BV-173    | hematopoietic/leukemia      | 429,8 |
| BxPC-3    | pancreas carcinoma          | 4234  |
| C32       | melanoma                    | 7793  |
| C32TG     | melanoma                    | 4033  |
| C-33 A    | cervix carcinoma            | 2956  |
| C-4 I     | cervix carcinoma            | 3782  |
| C-4 II    | cervix carcinoma            | 4226  |
| Caki-1    | renal carcinoma             | 3847  |
| Caki-2    | renal carcinoma             | 3895  |
| CAL-27    | HNSCC                       | 4049  |
| CAL-62    | thyroid carcinoma           | 3616  |
| Calu-1    | NSCLC                       | 5363  |
| Calu-6    | NSCLC                       | 3329  |
| CAMA-1    | breast carcinoma            | 4163  |
| Caov-3    | ovarian carcinoma           | 9140  |
| Capan-1   | pancreas carcinoma          | 5267  |
| Capan-2   | pancreas carcinoma          | 4573  |
| CCF-STTG1 | astrocytoma/glioblastoma    | 9512  |
| CCRF-CEM  | hematopoietic/leukemia      | 3645  |
| CEM/C1    | hematopoietic/leukemia      | 3076  |
| CFPAC-1   | pancreas carcinoma          | 4936  |
| CGTH-W-1  | thyroid carcinoma           | 8,969 |
| ChaGo-K-1 | NSCLC                       | 8175  |
| CHL-1     | melanoma                    | 1122  |
| CHP-212   | neuroblastoma               | 1039  |

JPET #244129

|             |                          |       |
|-------------|--------------------------|-------|
| CML-T1      | hematopoietic/leukemia   | 186,2 |
| COLO 201    | colon carcinoma          | 8177  |
| COLO 205    | colon carcinoma          | 4257  |
| COLO 320DM  | colon carcinoma          | 5102  |
| COLO 320HSR | colon carcinoma          | 8096  |
| COLO 829    | melanoma                 | 8817  |
| COR-L105    | NSCLC                    | 1657  |
| COR-L23     | NSCLC                    | 10000 |
| CRO-AP2     | hematopoietic/lymphoma   | 1353  |
| D283 Med    | medulloblastoma          | 2370  |
| Daoy        | medulloblastoma          | 4256  |
| Daudi       | hematopoietic/lymphoma   | 2288  |
| DB          | hematopoietic/lymphoma   | 3384  |
| DBTRG-05MG  | astrocytoma/glioblastoma | 10000 |
| Detroit 562 | HNSCC                    | 3775  |
| DK-MG       | astrocytoma/glioblastoma | 7927  |
| DLD-1       | colon carcinoma          | 6002  |
| DMS 114     | SCLC                     | 1743  |
| DMS 273     | SCLC                     | 3777  |
| DMS 53      | SCLC                     | 4126  |
| DOHH-2      | hematopoietic/lymphoma   | 1081  |
| DoTc2 4510  | cervix carcinoma         | 5299  |
| DU 145      | prostate carcinoma       | 5052  |
| EB-3        | hematopoietic/lymphoma   | 2444  |
| EFM-19      | breast carcinoma         | 3344  |
| EM-2        | hematopoietic/leukemia   | 182,5 |
| ES-2        | ovarian carcinoma        | 3225  |
| FaDu        | HNSCC                    | 5048  |
| G-401       | renal cancer other       | 1269  |
| G-402       | renal cancer other       | 12,67 |

JPET #244129

|               |                          |       |
|---------------|--------------------------|-------|
| H4            | astrocytoma/glioblastoma | 7826  |
| HCT 116       | colon carcinoma          | 1828  |
| HCT-15        | colon carcinoma          | 3911  |
| HCT-8         | colon carcinoma          | 1937  |
| HEC-1-A       | uterus carcinoma         | 4791  |
| HEL 92.1.7    | hematopoietic/leukemia   | 9434  |
| HeLa S3       | cervix carcinoma         | 4509  |
| Hep G2        | liver carcinoma          | 2133  |
| HL-60/MX1     | hematopoietic/leukemia   | 2120  |
| HLE           | liver carcinoma          | 1143  |
| HLF           | liver carcinoma          | 1284  |
| HMCB          | melanoma                 | 657,8 |
| HOS           | bone sarcoma             | 1623  |
| HPAF-II       | pancreas carcinoma       | 3583  |
| Hs 578T       | breast carcinoma         | 2274  |
| Hs 695T       | melanoma                 | 10000 |
| Hs 746T       | gastric carcinoma        | 8615  |
| Hs 766T       | pancreas carcinoma       | 4519  |
| HT            | hematopoietic/lymphoma   | 10000 |
| HT-1080       | sarcoma/soft tissue      | 3468  |
| HT-1197       | bladder carcinoma        | 6441  |
| HT-1376       | bladder carcinoma        | 5296  |
| HT-29         | colon carcinoma          | 2262  |
| HT-3          | cervix carcinoma         | 2927  |
| HuCC1         | liver carcinoma          | 3363  |
| HUH-6 Clone 5 | liver carcinoma          | 1049  |
| HuP-T4        | pancreas carcinoma       | 4448  |
| IMR-32        | neuroblastoma            | 2558  |
| J82           | bladder carcinoma        | 5762  |
| JAR           | placenta carcinoma       | 3672  |



JPET #244129

|                    |                        |       |
|--------------------|------------------------|-------|
| JEG-3              | placenta carcinoma     | 3729  |
| J.RT3-T3.5         | hematopoietic/leukemia | 3716  |
| Jurkat, Clone E6-1 | hematopoietic/leukemia | 4023  |
| K-562              | hematopoietic/leukemia | 782,6 |
| KATO III           | gastric carcinoma      | 204,6 |
| KHOS-240S          | bone sarcoma           | 1391  |
| KLE                | uterus carcinoma       | 10000 |
| KPL-1              | breast carcinoma       | 1331  |
| L-428              | hematopoietic/lymphoma | 10000 |
| LNCap.FGC          | prostate carcinoma     | 1398  |
| LS1034             | colon carcinoma        | 4265  |
| LS 174T            | colon carcinoma        | 2743  |
| Malme-3M           | melanoma               | 4699  |
| MCF7               | breast carcinoma       | 2247  |
| MC-IXC             | neuroblastoma          | 3420  |
| MDA-MB-231         | breast carcinoma       | 5668  |
| MDA-MB-436         | breast carcinoma       | 10000 |
| MDA-MB-453         | breast carcinoma       | 5119  |
| MDA-MB-468         | breast carcinoma       | 3618  |
| MEG-01             | hematopoietic/leukemia | 434,6 |
| MES-SA             | sarcoma/soft tissue    | 3417  |
| MeWo               | melanoma               | 3932  |
| MG-63              | bone sarcoma           | 1520  |
| MHH-PREB-1         | hematopoietic/lymphoma | 4923  |
| MIA PaCa-2         | pancreas carcinoma     | 1750  |
| MOLT-16            | hematopoietic/leukemia | 3518  |
| MOLT-3             | hematopoietic/leukemia | 10000 |
| MT-3               | breast carcinoma       | 2375  |
| MV-4-11            | hematopoietic/leukemia | 57,56 |
| NALM-6             | hematopoietic/leukemia | 1898  |

JPET #244129

|             |                         |       |
|-------------|-------------------------|-------|
| NCI-H292    | NSCLC                   | 1184  |
| NCI-H295R   | adrenal gland carcinoma | 10000 |
| NCI-H441    | NSCLC                   | 10000 |
| NCI-H446    | SCLC                    | 3023  |
| NCI-H460    | NSCLC                   | 4793  |
| NCI-H508    | colon carcinoma         | 4754  |
| NCI-H520    | NSCLC                   | 1303  |
| NCI-H596    | NSCLC                   | 10000 |
| NCI-H661    | NSCLC                   | 3206  |
| NCI-H69     | SCLC                    | 3230  |
| NCI-H747    | colon carcinoma         | 3545  |
| OCUG-1      | gallbladder carcinoma   | 10000 |
| OE19        | esophagus carcinoma     | 3271  |
| OE21        | esophagus carcinoma     | 3661  |
| OVCAR-3     | ovarian carcinoma       | 10000 |
| PANC-1      | pancreas carcinoma      | 3014  |
| PC-3        | prostate carcinoma      | 5636  |
| Raji        | hematopoietic/lymphoma  | 4860  |
| Ramos (RA1) | hematopoietic/lymphoma  | 4731  |
| RD          | rhabdomyosarcoma        | 1443  |
| RKO         | colon carcinoma         | 3640  |
| RKO-AS45-1  | colon carcinoma         | 3226  |
| RKO-E6      | colon carcinoma         | 3062  |
| RL          | hematopoietic/lymphoma  | 2189  |
| RL95-2      | uterus carcinoma        | 8985  |
| RPMI 6666   | hematopoietic/lymphoma  | 2312  |
| RPMI-7951   | melanoma                | 3411  |
| RPMI 8226   | hematopoietic/myeloma   | 4407  |
| SCaBER      | bladder carcinoma       | 4313  |
| SCC-25      | HNSCC                   | 2397  |

|           |                          |       |
|-----------|--------------------------|-------|
| SCC-4     | HNSCC                    | 3814  |
| SCC-9     | HNSCC                    | 7757  |
| SH-4      | melanoma                 | 2683  |
| SHP-77    | SCLC                     | 3219  |
| SiHa      | cervix carcinoma         | 5374  |
| SJCRH30   | rhabdomyosarcoma         | 356,8 |
| SJSA-1    | bone sarcoma             | 1721  |
| SK-BR-3   | breast carcinoma         | 3365  |
| SK-LMS-1  | sarcoma/soft tissue      | 3711  |
| SK-MEL-1  | melanoma                 | 9207  |
| SK-MEL-28 | melanoma                 | 5050  |
| SK-MEL-3  | melanoma                 | 3589  |
| SK-MES-1  | NSCLC                    | 3515  |
| SK-N-AS   | neuroblastoma            | 4309  |
| SK-N-DZ   | neuroblastoma            | 2478  |
| SK-NEP-1  | renal cancer other       | 9579  |
| SK-N-FI   | neuroblastoma            | 3122  |
| SKO-007   | hematopoietic/myeloma    | 4041  |
| SK-OV-3   | ovarian carcinoma        | 8807  |
| SK-UT-1   | sarcoma/soft tissue      | 5058  |
| SNB-19    | astrocytoma/glioblastoma | 3974  |
| SNU-1     | gastric carcinoma        | 1092  |
| SNU-16    | gastric carcinoma        | 565,2 |
| SNU-423   | liver carcinoma          | 3450  |
| SNU-5     | gastric carcinoma        | 10000 |
| SR        | hematopoietic/lymphoma   | 975,8 |
| ST486     | hematopoietic/lymphoma   | 3600  |
| SU.86.86  | pancreas carcinoma       | 7573  |
| SW 1088   | astrocytoma/glioblastoma | 3754  |
| SW1116    | colon carcinoma          | 10000 |

JPET #244129

|          |                          |       |
|----------|--------------------------|-------|
| SW-13    | adrenal gland carcinoma  | 3403  |
| SW 1353  | bone sarcoma             | 1683  |
| SW1417   | colon carcinoma          | 4910  |
| SW1463   | colon carcinoma          | 5000  |
| SW 1783  | astrocytoma/glioblastoma | 10000 |
| SW403    | colon carcinoma          | 6510  |
| SW48     | colon carcinoma          | 2028  |
| SW480    | colon carcinoma          | 10000 |
| SW579    | thyroid carcinoma        | 38,81 |
| SW620    | colon carcinoma          | 4589  |
| SW 684   | sarcoma/soft tissue      | 6832  |
| SW837    | colon carcinoma          | 3587  |
| SW 872   | sarcoma/soft tissue      | 3898  |
| SW 900   | NSCLC                    | 926,8 |
| SW948    | colon carcinoma          | 4082  |
| SW 954   | vulva carcinoma          | 2655  |
| SW962    | vulva carcinoma          | 1688  |
| SW 982   | sarcoma/soft tissue      | 8450  |
| T24      | bladder carcinoma        | 4738  |
| T-47D    | breast carcinoma         | 8031  |
| T84      | colon carcinoma          | 9000  |
| T98G     | astrocytoma/glioblastoma | 962,5 |
| TCCSUP   | bladder carcinoma        | 2225  |
| TE 381.T | rhabdomyosarcoma         | 1023  |
| THP-1    | hematopoietic/leukemia   | 7485  |
| U-138 MG | astrocytoma/glioblastoma | 3673  |
| U266B1   | hematopoietic/myeloma    | 1740  |
| U-2 OS   | bone sarcoma             | 1394  |
| U-87 MG  | astrocytoma/glioblastoma | 5485  |
| UM-UC-3  | bladder carcinoma        | 3303  |

JPET #244129

|       |                    |      |
|-------|--------------------|------|
| WI-38 | normal             | 1730 |
| WiDr  | colon carcinoma    | 1549 |
| Y79   | retinoblastoma     | 5808 |
| YAPC  | pancreas carcinoma | 4421 |

Hilberg et al.: Supplementary Figures:

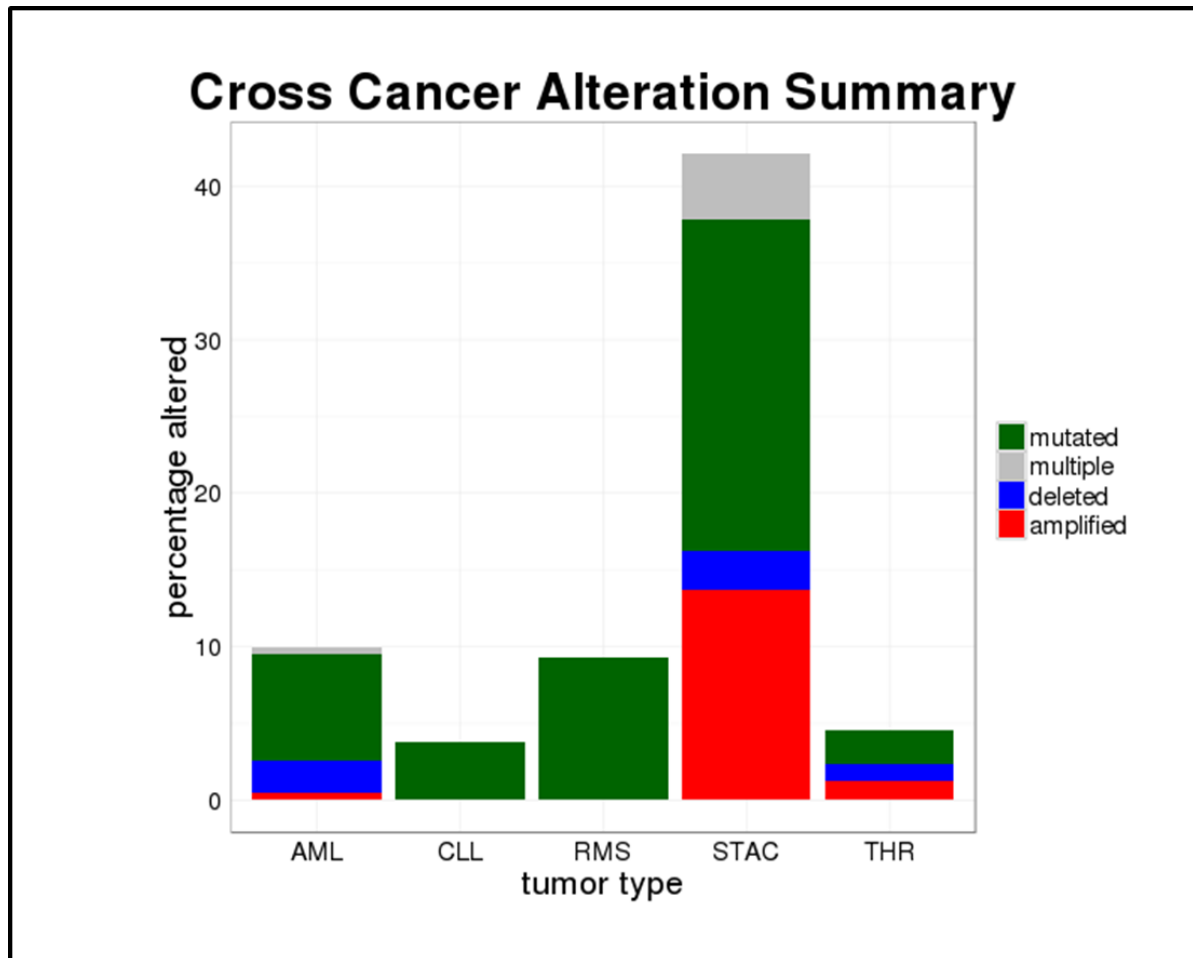

**Supplementary Figure S1**

Cross cancer alteration summary of all 16 kinases with alterations in the screened cell lines, AML: Acute Myeloid Leukemia, ALL: Acute Lymphoblastic Leukemia, RMS: Rhabdomyosarcoma, STAC: Stomach Adenocarcinoma, THR: Thyroid Cancer

### Overexpression in Human Tumor Types

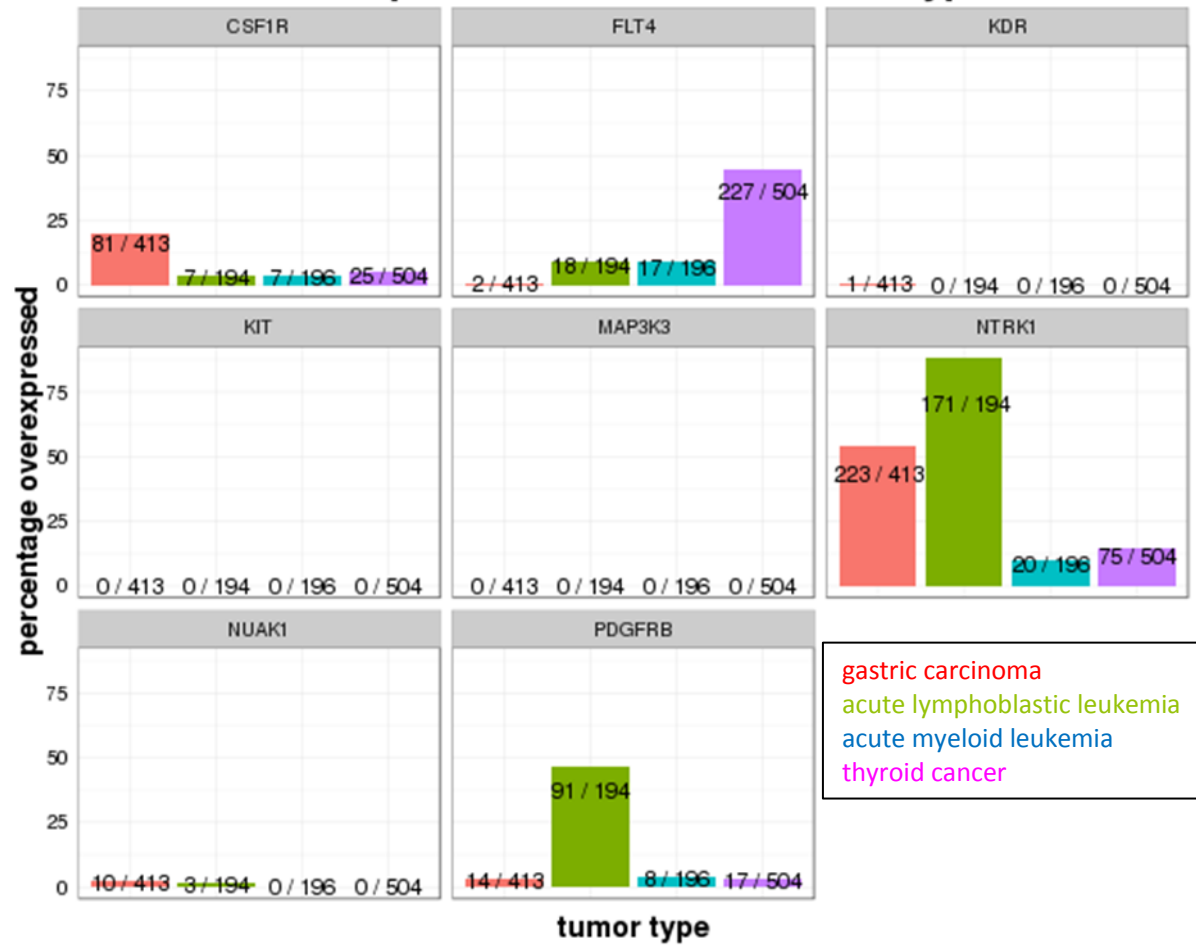

**Supplementary Figure S2**

Expression of selected genes in human tumor types corresponding to the respective tumor types of the sensitive cell lines. The numbers indicate numbers of samples with over expression versus all samples in the respective tumor type. Overexpression threshold is defined as :  $\text{mean}(\text{normal tissue}) + 3 * \text{stddev}(\text{normal tissue})$

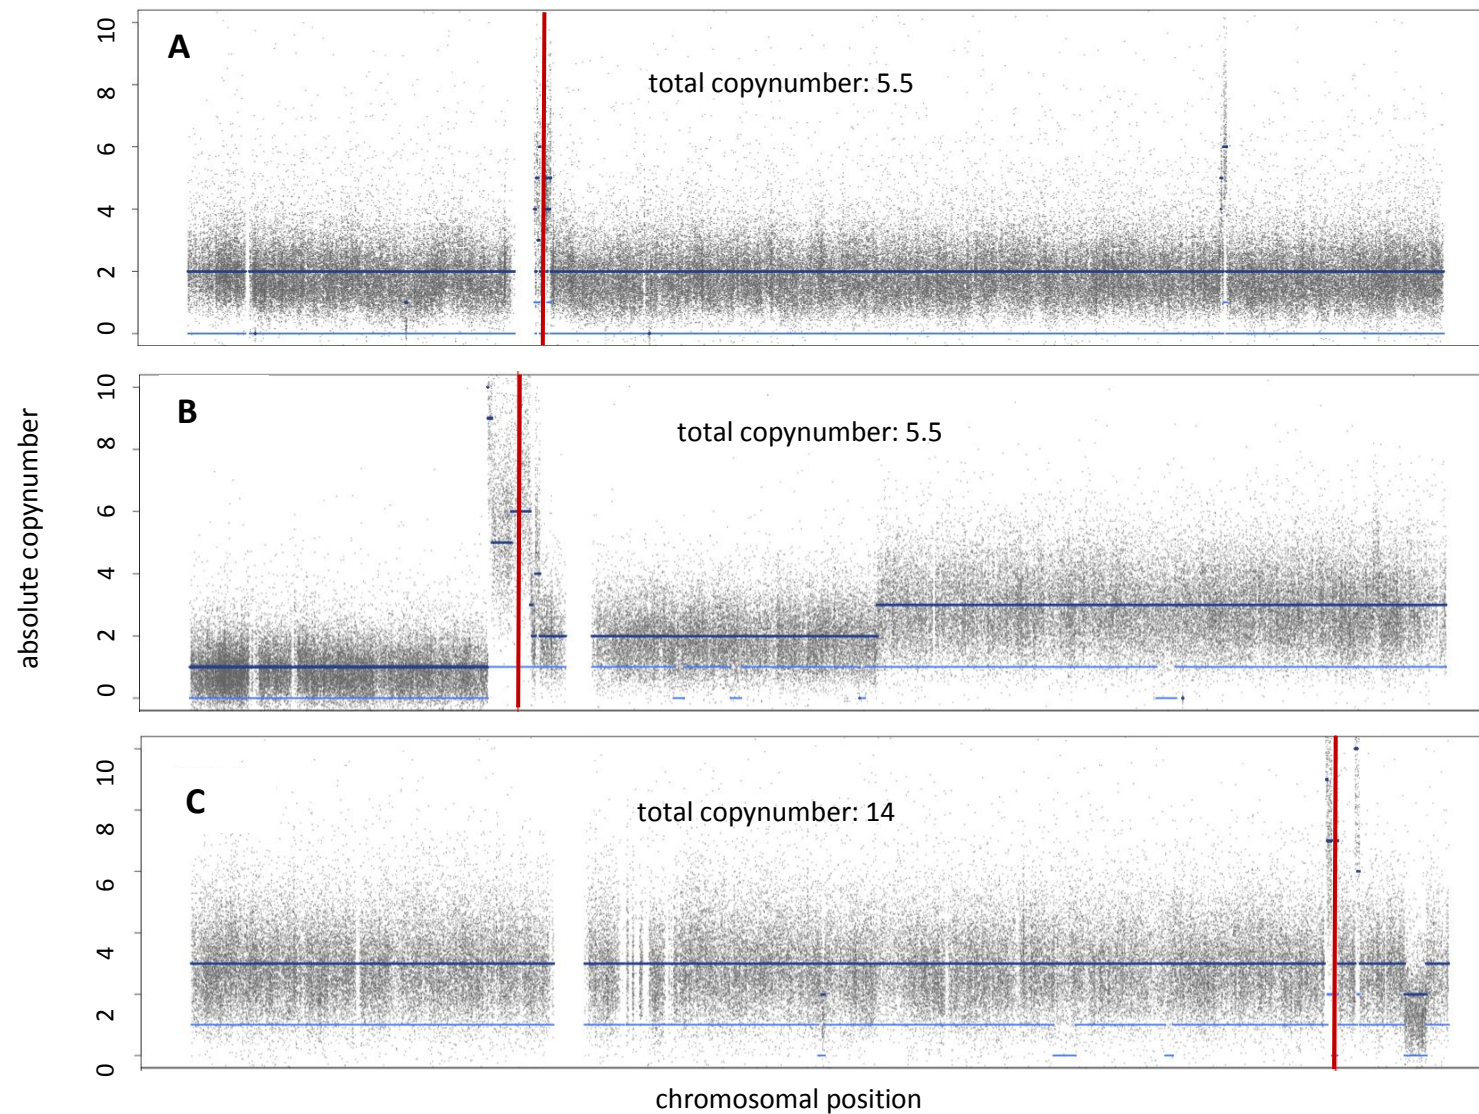**Supplementary Figure S3**

**A:** focal amplification of PDGFRA in NCI-H1703 cells. **B:** focal amplification of FGFR1 in NCI-H1703 cells. **C:** focal amplification of FGFR2 in tetraploid KATO III cells. The red line marks the position of the respective gene.



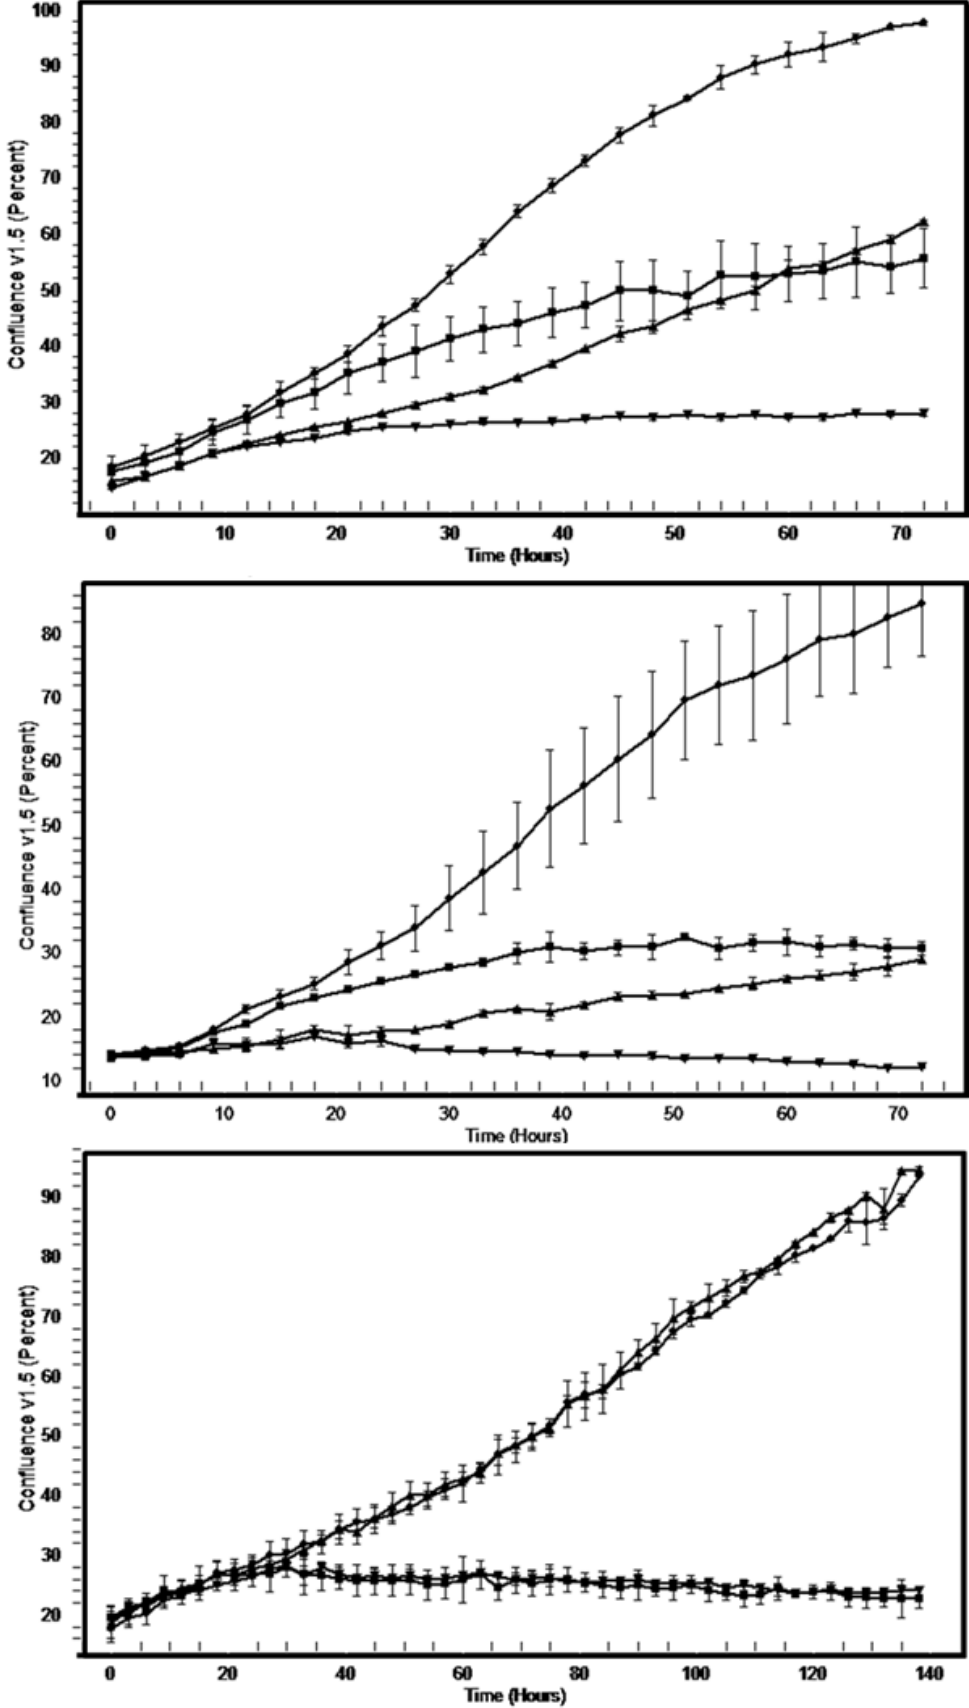

**Supplementary Figure S4**

Visualization and measurement of cell growth in AML cell lines: A) MOLM13, B) MV-4-11-B and C) THP1 by IncuCyte ZOOM® live cell imaging. Filled circles, DMSO @ 0.1%; filled upward triangles, Nintedanib @ 33 nM; filled squares, BI 894999 @ 10 nM; filled downward triangles, combination of BIBF1120 @ 33 nM and BI 894999 @ 10 nM.

**Hilberg et al.: Supplementary Method information:**

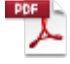

20120701 SSBK  
Customer Protocol an

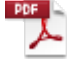

20120701  
SSBK-Adapta Custom

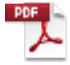

20120701  
SSBK-LanthaScreen B
